# Supplementary material
Source: PubMed Central journal article supplement (PMC3123081)
Supplement: supp_M111.244129_Sup.pdf [file supp_M111.244129_Sup.pdf]

Table S1. PCR Primer sets used in the current study.

| Clone                | Primer pair                                                                                                             |
|----------------------|-------------------------------------------------------------------------------------------------------------------------|
| <i>CmRBP50-S206A</i> | Forward 5'-GAACCAAAAGGCCGGCCAGCTCAACAGCCTG-3'<br>Reverse 5'-TGGCCGGCCTTTTGGTTCAGATGGCAGG-3'                             |
| <i>CmRBP50-S223A</i> | Forward 5'-GCATGTATGCACTTCAAGCAGCTGGAGCAGGA-3'<br>Reverse 5'-TGCTTGAAGTGCATACATGCCTCCCGCATC-3'                          |
| <i>CmRBP50-S429A</i> | Forward 5'-GTTTGCAAGCACGCTAGTGCTCTTAGTGGGT-3'<br>Reverse 5'-ACTAGCGTGCTTGCAAACAAGAGCTTCA-3'                             |
| <i>CmRBP50-TM</i>    | Forward 5'-GT-GGGTCGATCATTTCGCATTGCTTTTGCTCAGCTGC-<br>AGGCTATAGGTACC-3'<br>Reverse 5'-AATGCGAATGATCGACCCACTAAGCGAACT-3' |
| <i>CmGTPbP</i>       | Forward 5'-ATGGCTTTGCCGAATCAGCAGACT-3'<br>Reverse 5'-TACTCGAAAGCATCGTCGTCGTC-3'                                         |
| <i>CmCPI</i>         | Forward 5'-ATGGCGCTTCTTGGAGGTATC-3'<br>Reverse 5'-CTAAGCAGAGGAGCCCACAGA-3'                                              |
| <i>CmPSPL</i>        | Forward 5'-ATGTCTAAGCAGACCTACAGAGTG-3'<br>Reverse 5'-TTAAACAAATTCAAACCCCATCAG-3'                                        |
| <i>CmEP89</i>        | Forward 5'-ATGGCCACGGTTGATGATTCGAGTAGCG-3'<br>Reverse 5'-TCACCTCAACTGAGTTGCAGGGCT-3'                                    |
| <i>CmHSP</i>         | Forward 5'-ATGCGATCAGGAACTTGCGCAGCT-3'<br>Reverse 5'-TTAGTTTTCGAATTCCCATTCTGC-3'                                        |
| <i>CmPP16</i>        | Forward 5'-CACCATGGGGATGGGAATGATGGAG-3'<br>Reverse 5'-TTAGTGATGGTGATGGTGGTGGTTTTCCCATGGGTAA-<br>CATCC-3'                |
| <i>CmGTPbP</i>       | Forward 5'-CACCATGGCTTTGCCGAATCAGCAGACT-3'<br>Reverse 5'-TTAGTGATGGTGATGGTGGTGCTCGAAAGCATCGTCG-<br>TCGTC-3'             |
| <i>CmCPI</i>         | Forward 5'-CACCATGGCGCTTCTTGGAGGTATC-3'<br>Reverse 5'-CTAGTGATGGTGATGGTGGTGAGCAGAGGAGCCCACAGA-3'                        |
| <i>Cm-PSPL</i>       | Forward 5'-CACCATGTCTAAGCAGACCTACAGAGTG-3'<br>Reverse 5'-TTAGTGATGGTGATGGTGGTGAACAAATTCAAACCCCA-<br>TCAG-3'             |
| <i>CmEP8-9</i>       | Forward 5'-CACCATGGCCACGGTTGATGATTCGAGTAGCG-3'<br>Reverse 5'-TCAGTGATGGTGATGGTGGTGCCTCAACTGAGTTGCAGG-<br>GCT-3'         |
| <i>CmHSP</i>         | Forward 5'-CACCATGCGATCAGGAACTTGCGCAGCT-3'<br>Reverse 5'-TTAGTGATGGTGATGGTGGTGGTTTTCGAA-TTCCATT-<br>CTGC-3'             |
| <i>GST</i>           | Forward 5'-CACCATGTCCCCTATACTAGGTTATTGG-3'<br>Reverse 5'-CACCATGTCCCCTATACTAGGTTATTGG-3'                                |

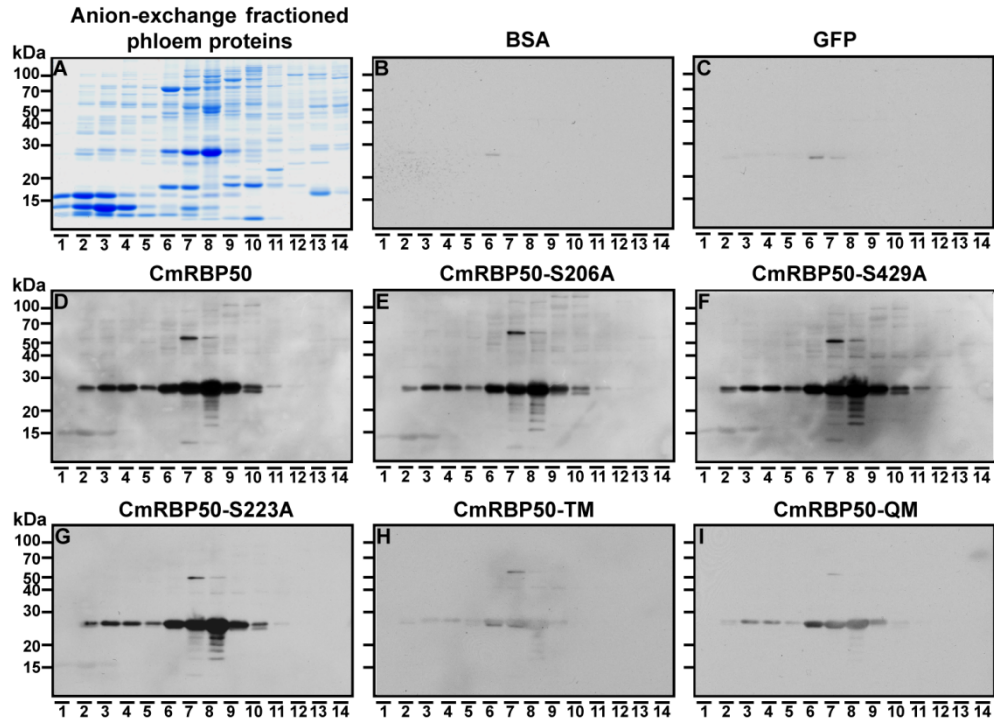

**FIGURE S1. Protein overlay assays establish that C-terminal phosphorylation of CmRBP50 is necessary for interaction with pumpkin phloem proteins.** (A) FPLC-fractionated proteins from pumpkin phloem exudate. Proteins were separated on a 13% SDS-PAGE gel and then stained with GelCode Blue reagent. FPLC-fractionated phloem proteins were blotted onto nitrocellulose membrane and then overlaid with the following in-planta expressed and purified proteins carrying a (c-Myc)<sub>4</sub>-His<sub>6</sub> tag: BSA (B), GFP (C), CmRBP50 (D), CmRBP50-S206A (E), CmRBP50-S429A (F), CmRBP50-S223A (G), CmRBP50-TM (H), or CmRBP50-QM (I). Interaction was detected using anti-c-Myc monoclonal antibody.

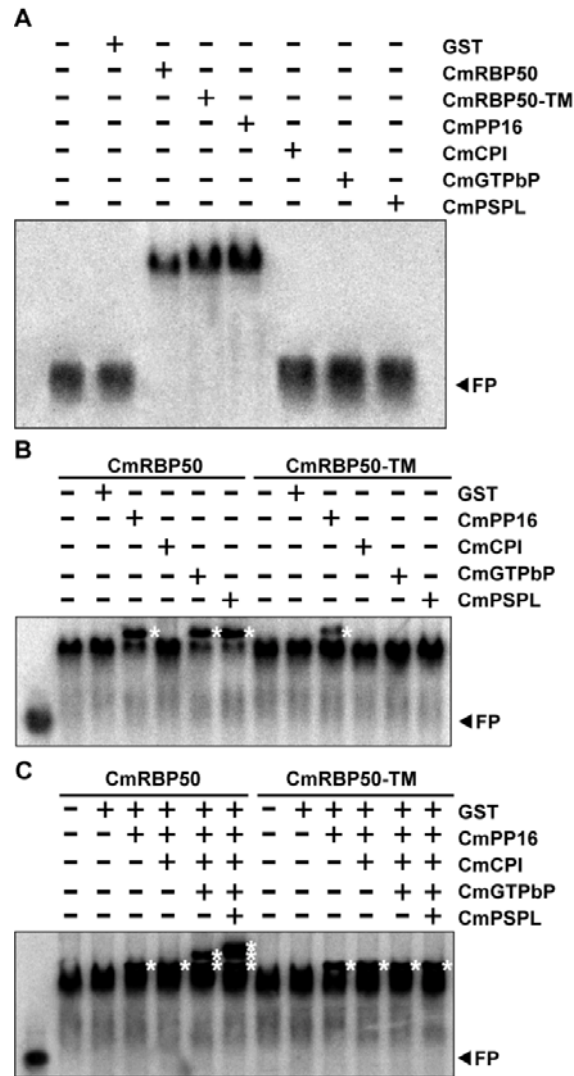

**FIGURE S2. CmRBP50 Binding to *CmGAIP* mRNA is enhanced in the presence of components of the phloem RNP complex.** (A) Gel mobility-shift assays performed using recombinant purified CmRBP50, CmRBP50-TM, CmPP16, CmCPI, CmGTPbP, or CmPSPL and a 2.2 kb <sup>32</sup>P-labeled full-length *CmGAIP* RNA riboprobe (10 nM) that contains PTB motifs. Note that, of the protein components in a CmRBP50 RNP complex, only CmRBP50 and CmPP16 exhibit RNA binding capacity. (B) Effect of individual CmRBP50 interacting proteins on CmRBP50 RNA-binding capacity. Recombinant purified CmRBP50 or CmRBP50-TM was mixed with GST, CmPP16, CmCPI, CmGTPbP, or CmPSPL, respectively, for gel mobility-shift assays. Asterisks indicate additional bands formed in the presence of CmRBP50/CmRBP50-TM and the indicated protein. (C) Combinatorial effect of CmRBP50 interacting proteins on the capacity of CmRBP50 to form complexes with *CmGAIP* RNA. The RNA-CmRBP50 complexes were assembled as indicated at the top of the panel. Asterisks indicate additional bands formed in the presence of CmRBP50/CmRBP50-TM and the indicated proteins. FP indicates free probe.
